# Supplementary material for: Visualizing the fluorescence of AgPt NCs by an asymmetrical pseudo-ligand exchange method
Source: Royal Society of Chemistry journal article supplement (doi:10.1039/d4qi01275e), 2024-01-01
Supplement: d4qi01275e1.pdf [file d4qi01275e1.pdf]

## Supporting Information

### Visualizing the fluorescence of AgPt NCs by an asymmetrical pseudo-ligand exchange method

Lizhong He <sup>a, b \*</sup>, Tingting Dong <sup>c</sup>, Xiaoyang Hu <sup>d</sup> and Zibao Gan <sup>d \*</sup>

a: School of Materials Science & Engineering, Xi'an Polytechnic University, Xi'an 710048, PR China;

b: Institute of Solid State Physics, Chinese Academy of Sciences, Hefei 230031, PR China;

Email: lzhe@xpu.edu.cn

c: School of Environmental Science and Engineering, Shaanxi University of Science and Technology, Xi'an 710021, PR China.

d: School of Chemistry and Chemical Engineering, Linyi University, West Side of North Section of Industrial Avenue, Linyi, 276000, PR China;

Email: ganzibao@lyu.edu.cn

## 1. Supporting Figures

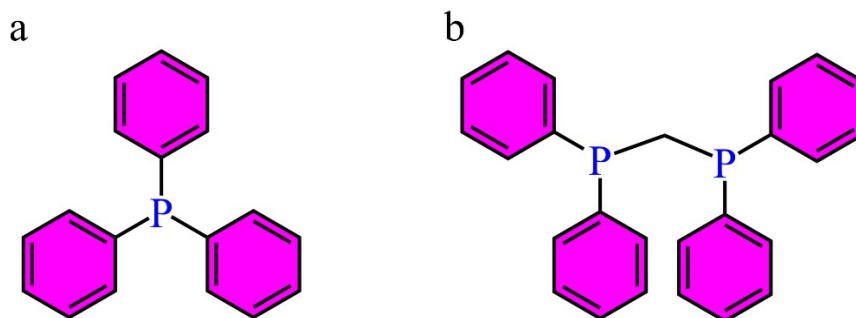

**Figure S1.** The structures of (a)  $\text{PPh}_3$  and (b)  $\text{dppm}$ , respectively.

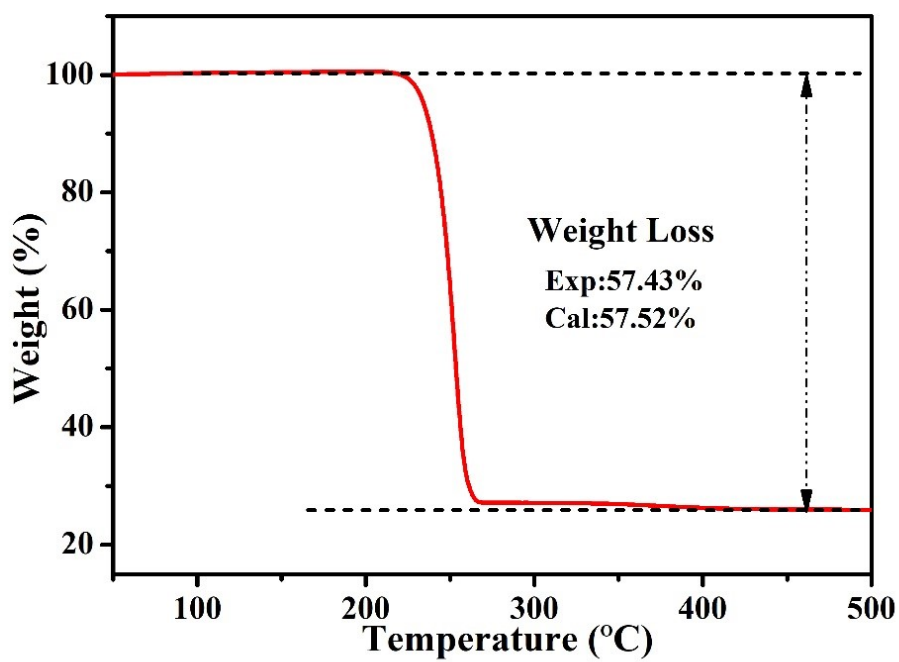

**Figure S2.** TGA of  $\text{Ag}_{16}\text{Pt}$  NC.

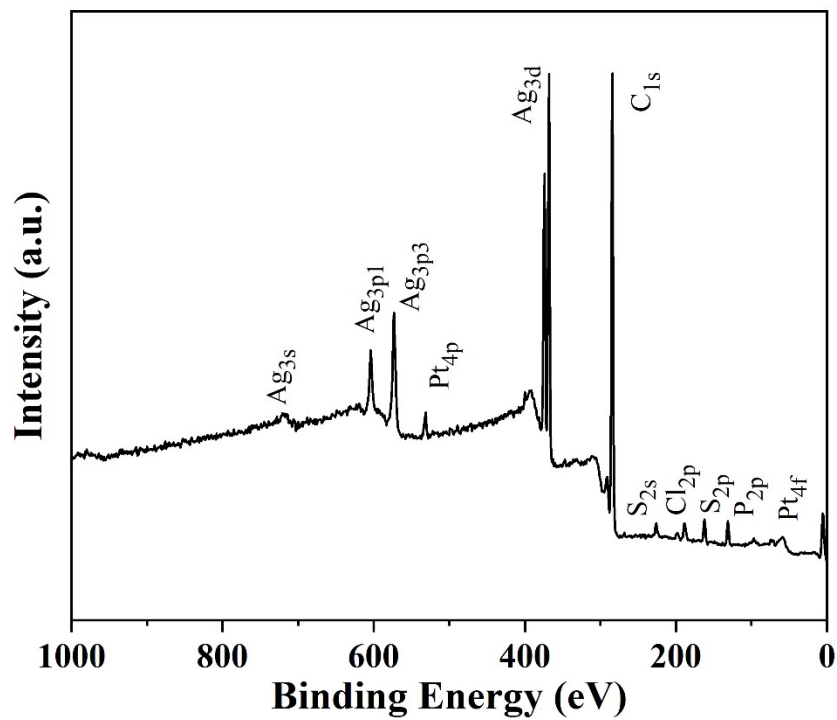

Figure S3. XPS spectrum of Ag<sub>16</sub>Pt NC.

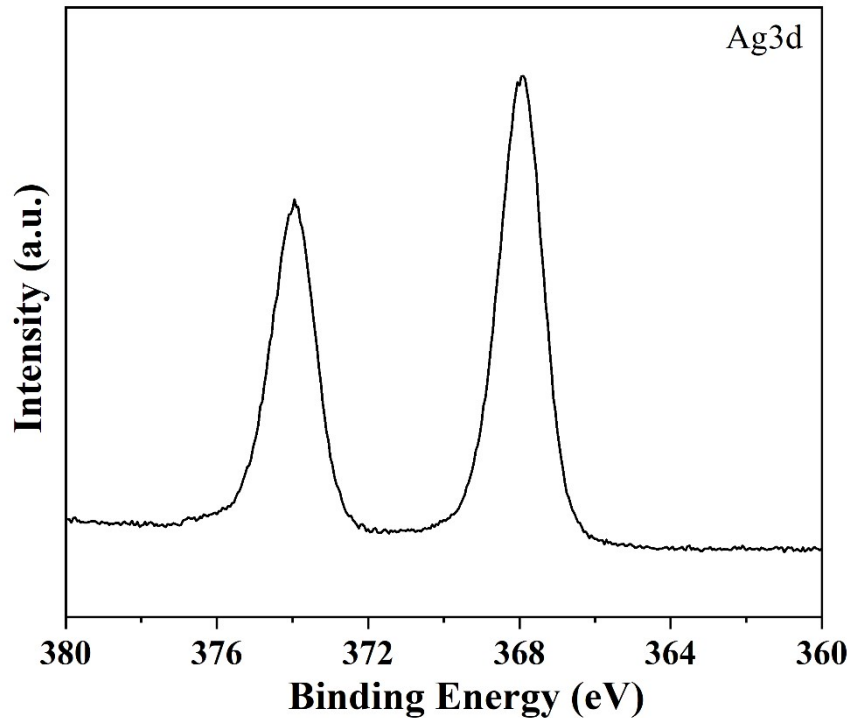

Figure S4. XPS spectrum of Ag<sub>3d</sub> in the Ag<sub>16</sub>Pt NC.

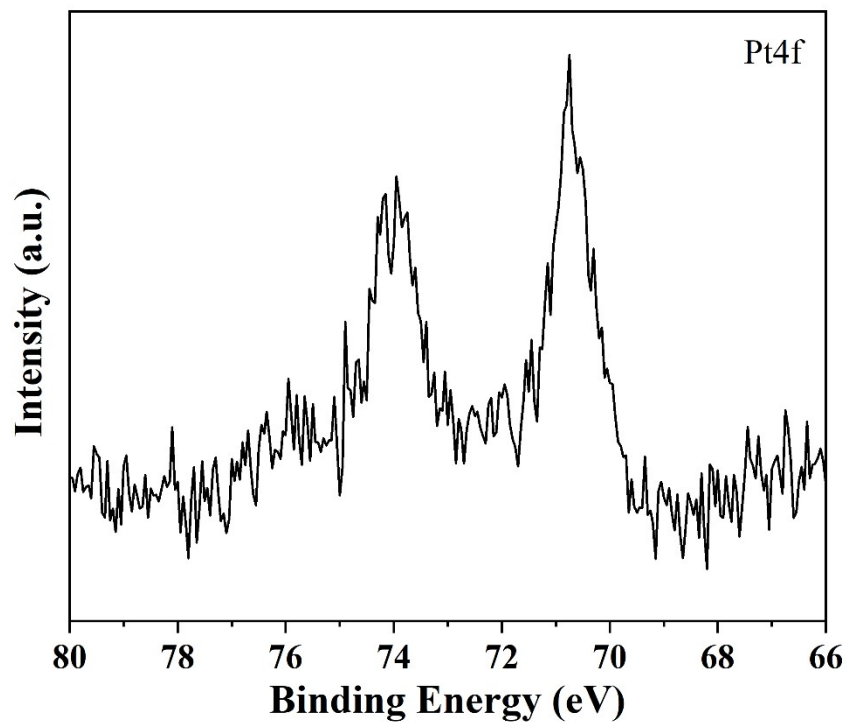

Figure S5. XPS spectrum of Pt<sub>4f</sub> in the Ag<sub>16</sub>Pt NC.

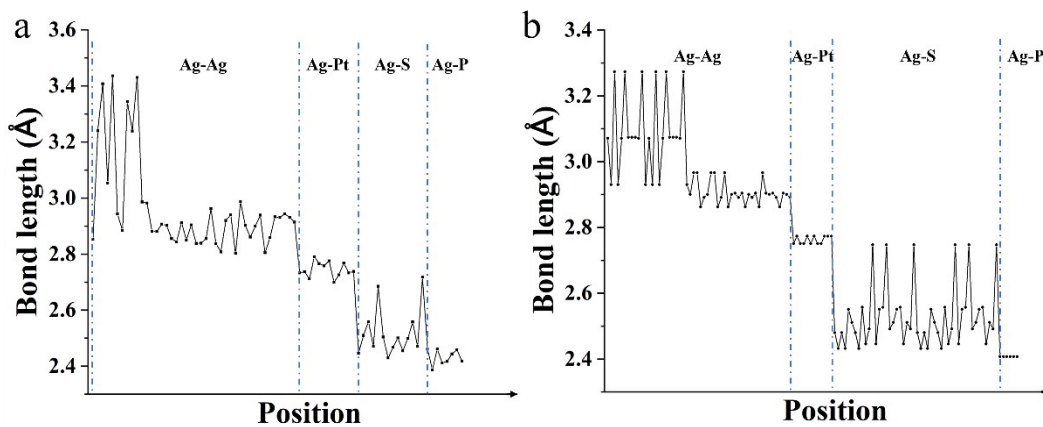

Figure S6. Bond lengths of (a) Ag<sub>16</sub>Pt and (b) Ag<sub>26</sub>Pt NCs, respectively.

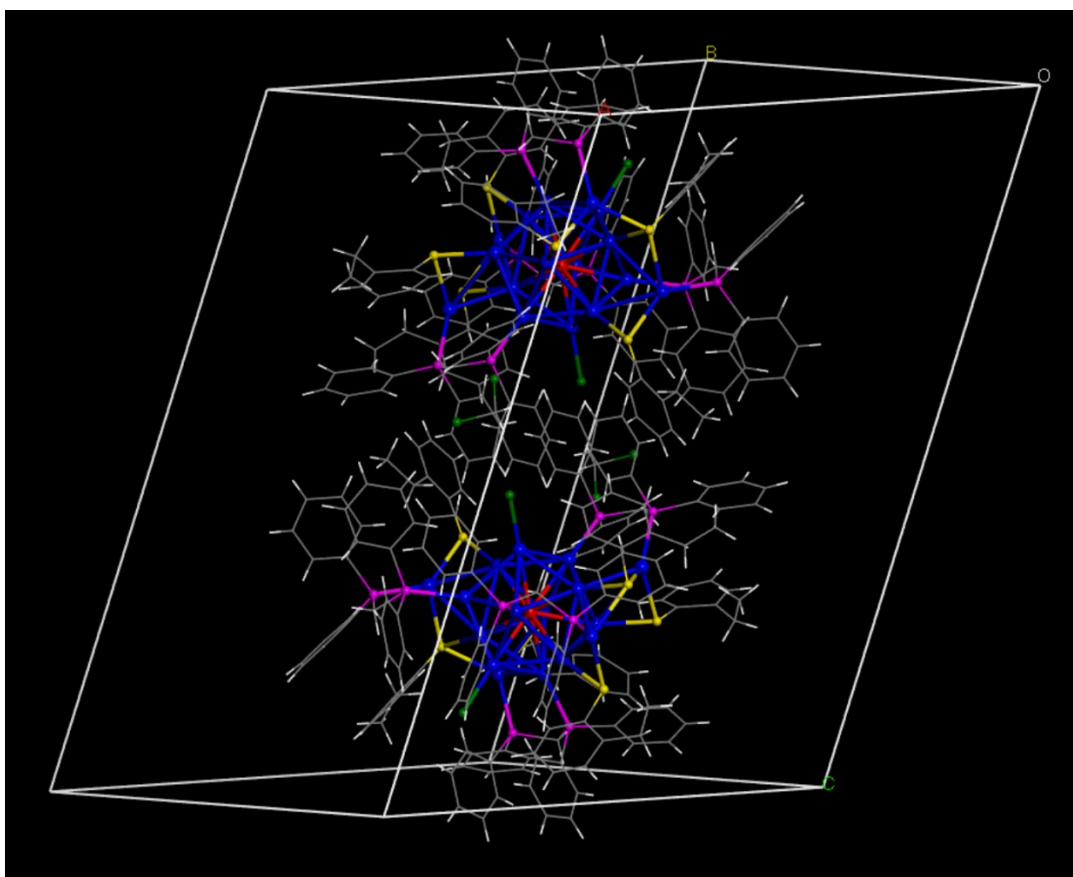

**Figure S7.** Unit cell of the three-dimensional structure of the  $\text{Ag}_{16}\text{Pt}$  NCs in a ball and stick model. Color codes: blue Ag, red Pt, yellow S, magenta P, gray C and White H.

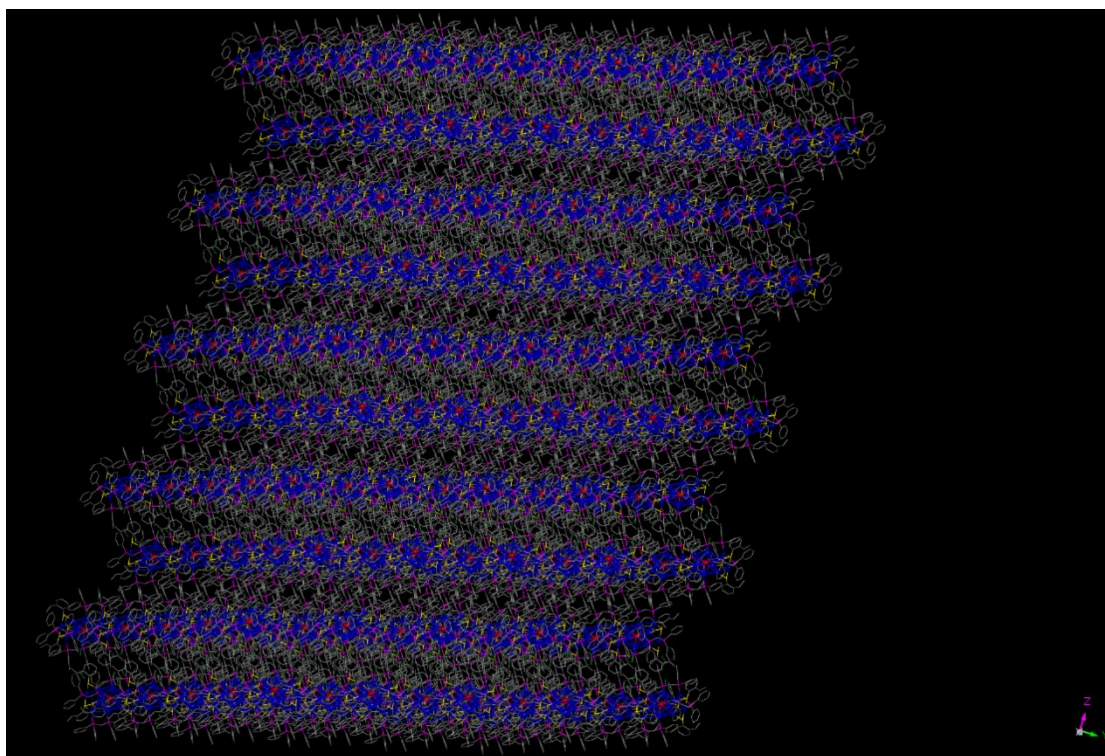

**Figure S8.** Multilayer stacking structure of the Ag<sub>16</sub>Pt NCs (viewed from X direction).  
Color code: blue Ag; red, Pt; yellow, S; magenta, P; gray, C; white, H.

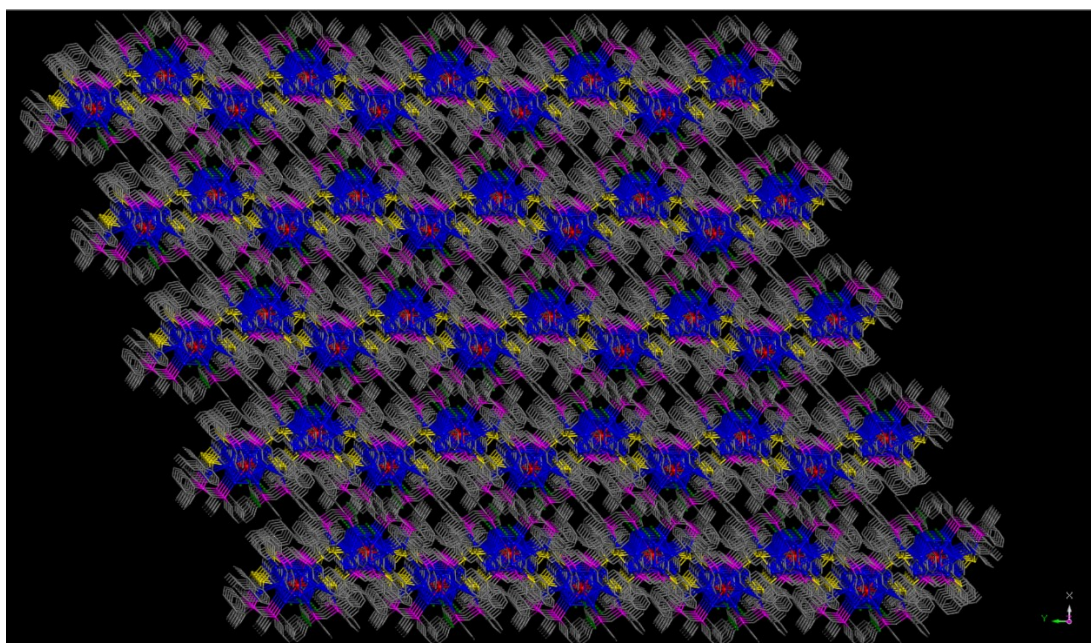

**Figure S9.** Multilayer stacking structure of the Ag<sub>16</sub>Pt NCs (viewed from Z direction).  
Color code: blue Ag; red, Pt; yellow, S; magenta, P; gray, C; white, H.



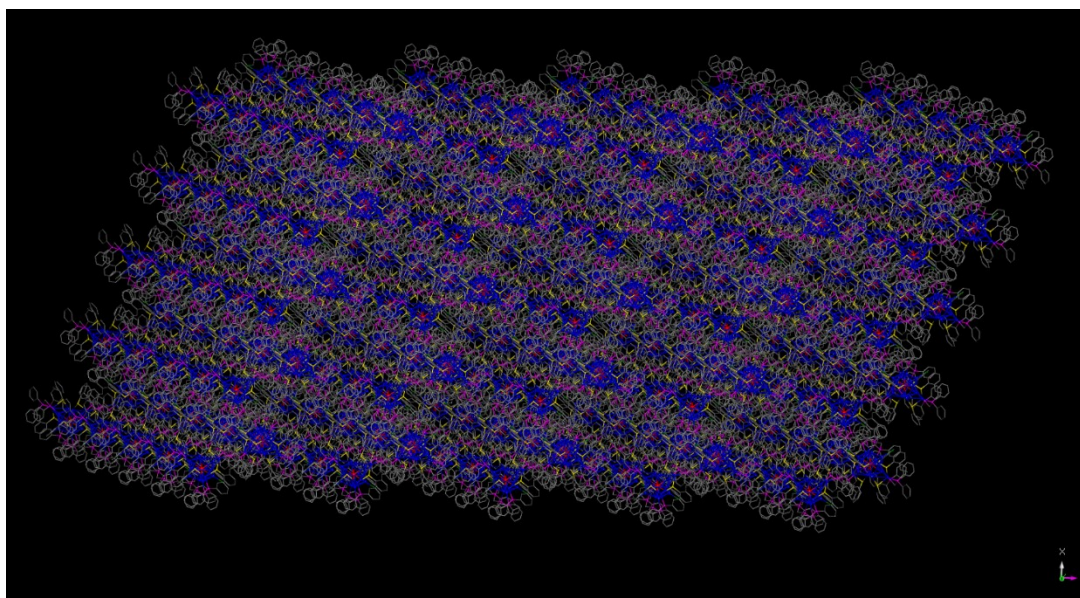

**Figure S10.** Multilayer stacking structure of the Ag<sub>16</sub>Pt NCs (viewed from Y direction). Color code: blue Ag; red, Pt; yellow, S; magenta, P; gray, C; white, H.

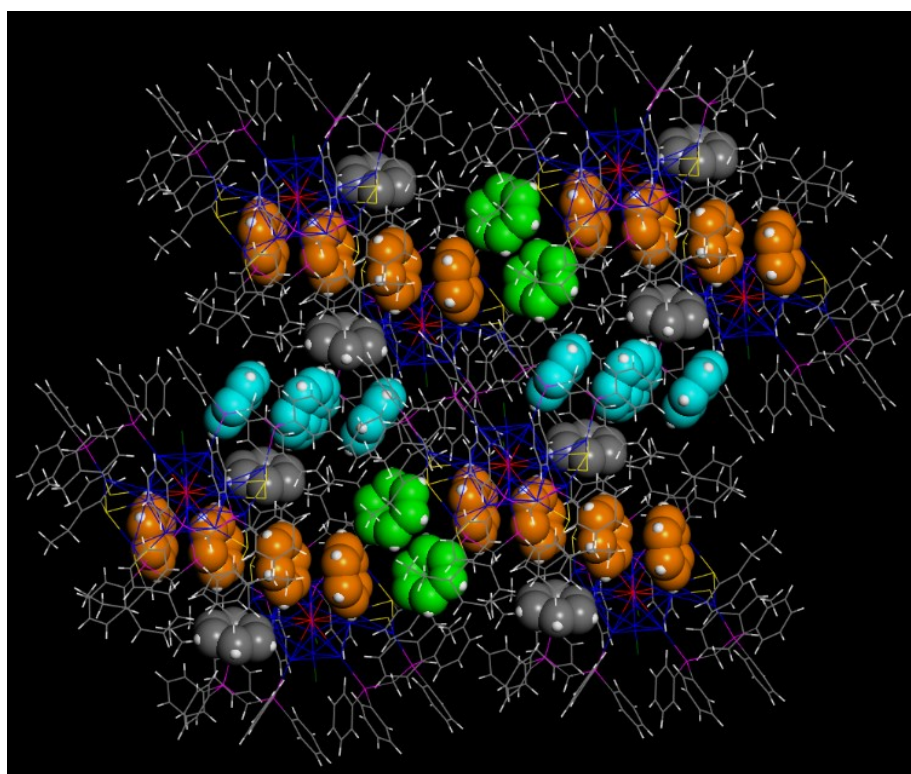

**Figure S11.** The inter-nanocluster C-H... $\pi$ , and  $\pi$ ... $\pi$  interactions in the Ag<sub>16</sub>Pt NCs. Color codes: red, Pt; blue, Ag; yellow, S; gray, green, brown and light blue, C; white, H.

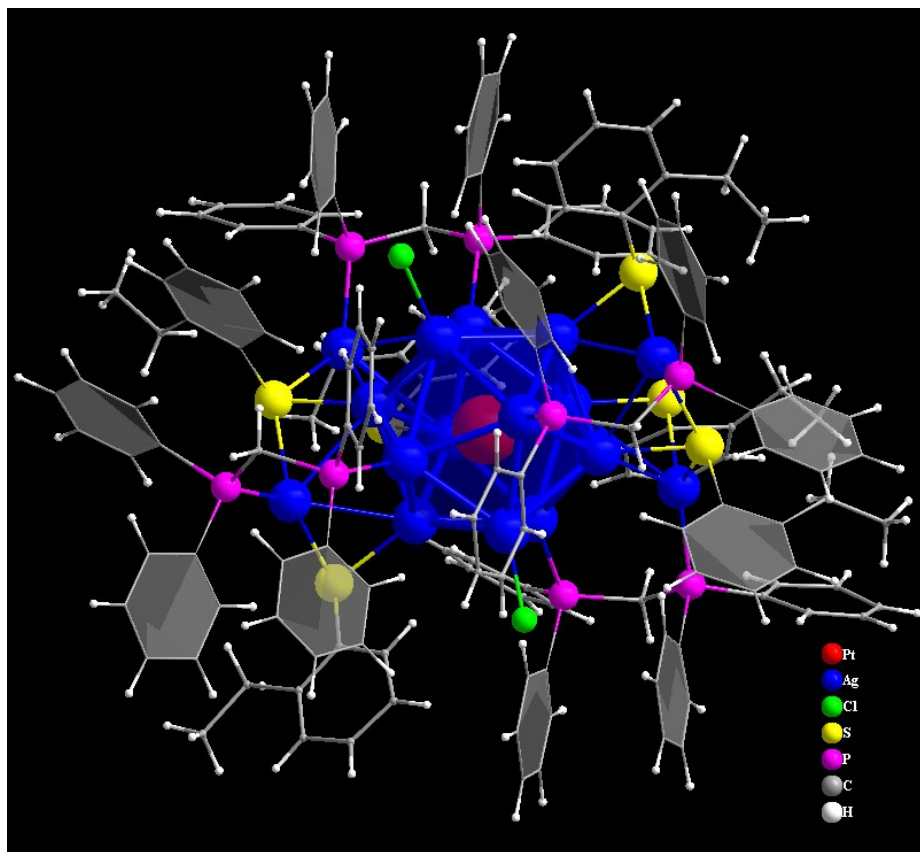

**Figure S12.** The intra-nanocluster  $\pi \cdots \pi$  interactions in the Ag<sub>16</sub>Pt NC.



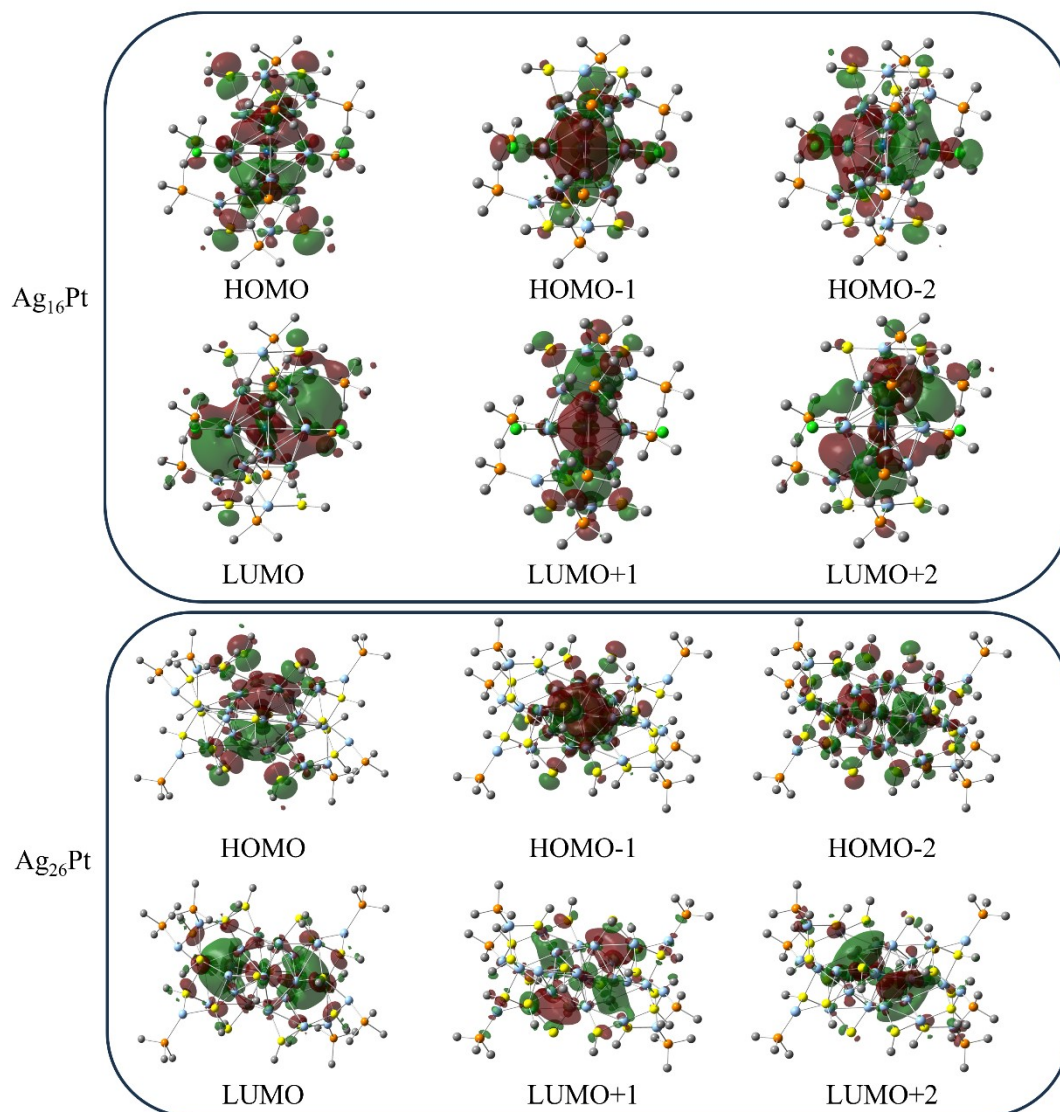

**Figure S13.** Electron densities of the HOMO, HOMO-1, HOMO-2 and LUMO, LUMO+1, LUMO+2 of the Ag<sub>16</sub>Pt and the Ag<sub>26</sub>Pt NCs.

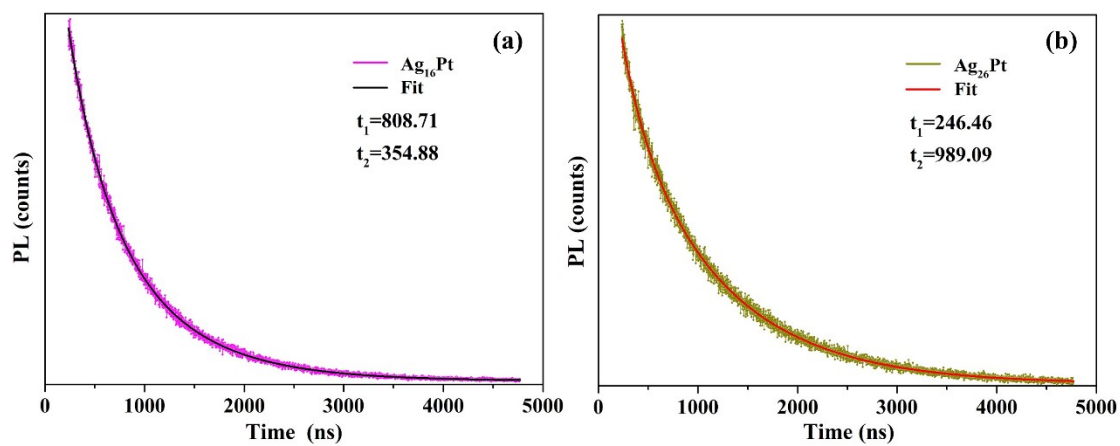

**Figure S14.** Fluorescence decay profiles of the Ag<sub>16</sub>Pt and the Ag<sub>26</sub>Pt NCs.

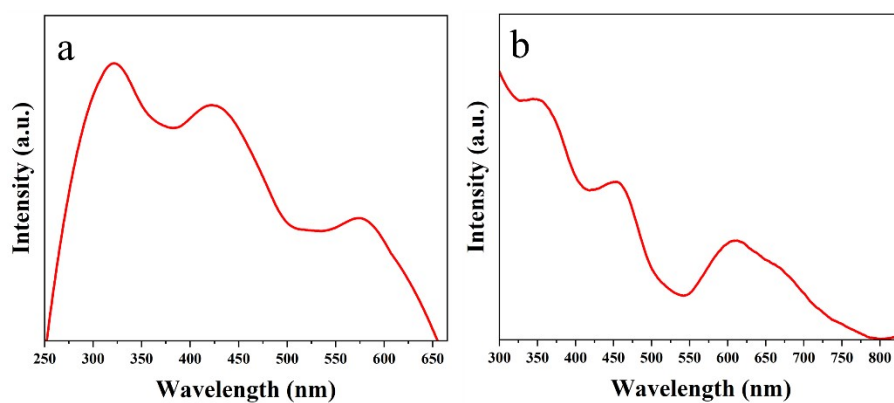

**Figure S15.** The excitation spectra of Ag<sub>16</sub>Pt and Ag<sub>26</sub>Pt NCs, respectively.

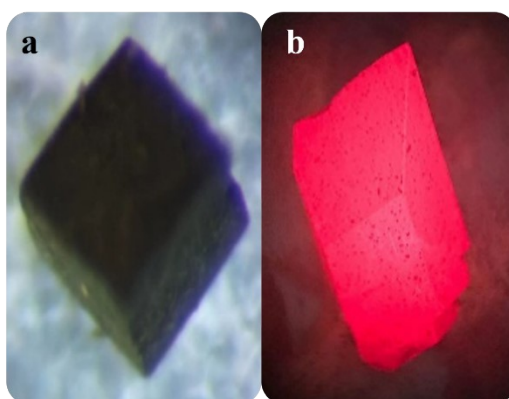

**Figure S16.** The optical photographs of (a) Ag<sub>26</sub>Pt and (b) Ag<sub>16</sub>Pt NC crystals under 365 nm UV light irradiation.

## 2. Single crystal data

### 2.1 Single crystal data of Ag<sub>16</sub>Pt NC

|                                                |                                                                                                                  |
|------------------------------------------------|------------------------------------------------------------------------------------------------------------------|
| Empirical formula                              | C <sub>148</sub> H <sub>142</sub> Ag <sub>16</sub> Pt <sub>1</sub> S <sub>6</sub> P <sub>8</sub> Cl <sub>2</sub> |
| Formula weight                                 | 4522.46                                                                                                          |
| Temperature/ K                                 | 150                                                                                                              |
| Wavelength                                     | 1.34139 Å                                                                                                        |
| Crystal system                                 | triclinic                                                                                                        |
| Space group                                    | P-1                                                                                                              |
| Unit cell dimensions                           | a = 18.450(6) Å    α=75.225(11)<br>b= 18.992(6) Å    β=73.008(10)<br>c = 29.482(9) Å    γ=64.526(11)             |
| Volume/ Å <sup>3</sup>                         | 8819(5)                                                                                                          |
| Z                                              | 2                                                                                                                |
| ρ <sub>calc</sub> /cm <sup>3</sup>             | 1.703                                                                                                            |
| μ/mm <sup>-1</sup>                             | 12.134                                                                                                           |
| F(000)                                         | 4388.0                                                                                                           |
| Index ranges                                   | -22<=h<=22, -23<=k<=23, -35<=l<=36                                                                               |
| Reflections collected                          | 127207                                                                                                           |
| Independent reflections                        | 33557 [R <sub>int</sub> = 0.0909, R <sub>sigma</sub> =0.0831]                                                    |
| 2θ range for data collection                   | 4.534°- 110.668°                                                                                                 |
| Data / restraints / parameters                 | 33557 / 3316 / 1691                                                                                              |
| Goodness-of-fit on F <sup>2</sup>              | 1.093                                                                                                            |
| Final R indices [I>2σ(I)]                      | R <sub>1</sub> = 0.0847, wR <sub>2</sub> = 0.2419                                                                |
| R indices (all data)                           | R <sub>1</sub> = 0.1073, wR <sub>2</sub> = 0.2624                                                                |
| Extinction coefficient                         | n/a                                                                                                              |
| Largest diff. peak and hole/ e Å <sup>-3</sup> | 3.50 and -3.13                                                                                                   |
